# Supplementary material for: Invasive cardiovascular magnetic resonance (iCMR) for diagnostic right and left heart catheterization using an MR-conditional guidewire and passive visualization in congenital heart disease
Source: PubMed Central journal article supplement (PMC7098096; doi:10.1186/s12968-020-0605-9), 2020-03-26
Supplement: 12968_2020_605_MOESM2_ESM.pdf [file 12968_2020_605_MOESM2_ESM.pdf]

| Patient | Age (years) | Sex | Diagnosis                                                                             | Clinical Question        | Success |
|---------|-------------|-----|---------------------------------------------------------------------------------------|--------------------------|---------|
| #1      | 13          | M   | LPA stenosis                                                                          | PA stenosis              | Yes     |
| #2      | 2           | F   | Anatomically corrected malposition of the great arteries s/p modified DKS s/p Glenn   | Pre-Fontan               | Yes     |
| #3      | 0.25        | M   | AVC, pulmonary atresia with discontinuous PAs s/p unifocalization with BTS            | 1V vs 2V repair          | Yes     |
| #4      | 17          | F   | TOF s/p surgical bioprosthetic pulm valve implantation s/p LPA stent                  | RV volumes               | Yes     |
| #5      | 2           | M   | TOF with absent PV s/p RV-PA conduit with a 12 mm Aortic homograft with LeCompte      | RV volumes               | Yes     |
| #6      | 5           | M   | HRHS + d-TGA s/p Norwood/Sano s/p Glenn s/p extracardiac fenestrated Fontan           | Fenestrated Fontan       | Yes     |
| #7      | 7           | M   | HLHS s/p Glenn s/p fenestrated Fontan                                                 | Fenestrated Fontan       | Yes     |
| #8      | 4           | M   | HLHS s/p Norwood/Sano s/p Glenn                                                       | Pre-Fontan               | No      |
| #9      | 4           | M   | HLHS s/p Norwood/Sano s/p Glenn                                                       | Pre-Fontan               | Yes     |
| #10     | 4           | M   | HLHS s/p Norwood/Sano s/p Glenn                                                       | Pre-Fontan               | Yes     |
| #11     | 5           | M   | Severe Discrete CoA                                                                   | Coarctation              | Yes     |
| #12     | 4           | M   | HLHS s/p Norwood/Sano s/p Glenn                                                       | Pre-Fontan               | Yes     |
| #13     | 2           | F   | T21 with a PDA                                                                        | iNO testing              | Yes     |
| #14     | 4           | M   | TA + dTGA and a discrete CoA s/p Norwood/BTS s/p Glenn                                | Pre-Fontan               | Yes     |
| #15     | 5           | M   | HLHS, s/p Norwood/Sanos/p Glenn                                                       | Pre-Fontan               | Yes     |
| #16     | 5           | M   | HRHS + pulm atresia s/p BTS s/p Glenn s/p extracardiac fenestrated Fontan + LPA stent | Fenestrated Fontan       | Yes     |
| #17     | 5           | M   | T21 s/p PDA closure with an ASD and concern for pulmonary HTN                         | iNO testing              | Yes     |
| #18     | 7           | M   | TA s/p BTS + PDA ligation, s/p Glenn s/p extracardiac fenestrated Fontan              | Fenestrated Fontan       | Yes     |
| #19     | 16          | M   | T21 + ASD, VSD + PDA with concern for pulmonary HTN                                   | iNO testing              | Yes     |
| #20     | 4           | M   | DILV (S,L,L), s/p pulsatile Glenn with a PAB                                          | Pre-Fontan               | Yes     |
| #21     | 16          | M   | DILV s/p extracardiac nonfenestrated Fontan with a Fontan stent and concern for PLE   | Non-Fenestrated Fontan   | Yes     |
| #22     | 8           | F   | TOF with pulmonary atresia s/p RV-PA conduit s/p RV-PA conduit stent                  | RV volumes               | Yes     |
| #23     | 5           | M   | Heterotaxy, common AVC, s/p Glenn                                                     | Pre-Fontan               | Yes     |
| #24     | 13          | F   | Severe Discrete CoA                                                                   | Coarctation              | Yes     |
| #25     | 11          | M   | HLHS s/p Glenn s/p fenestration Fontan                                                | Fenestrated Fontan       | Yes     |
| #26     | 3           | M   | Dextrocardia, HLHS variant s/p Glenn                                                  | Pre-Fontan               | Yes     |
| #27     | 11          | M   | Severe Discrete CoA                                                                   | Coarctation              | No      |
| #28     | 10          | M   | Severe Discrete CoA                                                                   | Coarctation              | Yes     |
| #29     | 6           | F   | d-TGA s/p switch with concern for branch PA stenosis                                  | PA stenosis              | Yes     |
| #30     | 9           | M   | HLHS s/p Norwood/Sano s/p Glenn                                                       | Fenestrated Fontan       | No      |
| #31     | 4           | F   | Pulmonary atresia with an IVS s/p ductal shunt s/p Glenn                              | Pre-Fontan               | Yes     |
| #32     | 33          | F   | Pulmonary atresia with an IVS s/p BTS s/p Glenn s/p Lateral Tunnel Fontan             | Non-fenestrated Fontan   | Yes     |
| #33     | 7           | F   | s/p OHT                                                                               | RVEDP, myocardial biopsy | Yes     |
| #34     | 12          | M   | HLHS variant s/p PAB s/p Glenn s/p Lateral Tunnel Fontan                              | Fenestrated Fontan       | Yes     |
